# Supplementary material for: Filler size effect in an attractive fibrillated network: a structural and rheological perspective
Source: Royal Society of Chemistry journal article supplement (doi:10.1039/c9sm02175b), 2020-01-01
Supplement: c9sm02175b1.pdf [file c9sm02175b1.pdf]

† Electronic supplementary information (ESI)

# Filler size effect in an attractive fibrillated network: a structural and rheological perspective

Vincenzo Calabrese,<sup>a\*</sup> Marcelo A. da Silva,<sup>a</sup> Lionel Porcar,<sup>b</sup> Saffron J. Bryant,<sup>a</sup>

Kazi M. Zakir Hossain,<sup>a</sup> Janet L. Scott,<sup>a,c</sup> Karen J. Edler<sup>a\*</sup>

<sup>a</sup> Department of Chemistry, University of Bath, Claverton Down, Bath, BA2 7AY, United Kingdom

<sup>b</sup> Institut Laue-Langevin, 71 avenue des Martyrs, CS 20156, 38042 Grenoble cedex 9, France

<sup>c</sup> Centre for Sustainable Chemical Technologies, University of Bath, Claverton Down, Bath, BA2 7AY, United Kingdom

\*vc355@bath.ac.uk (permanent address: 355calabrese@gmail.com), k.edler@bath.ac.uk

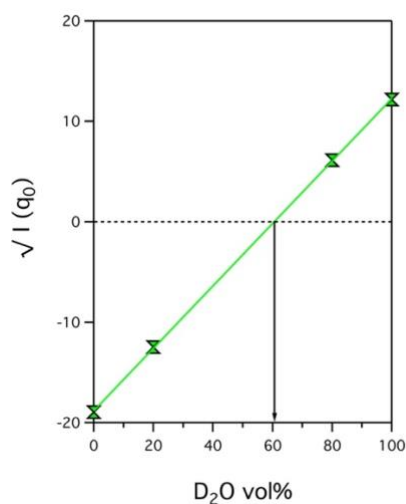

Fig. S1 Contrast match experiment performed for 2.5 wt% SiNp<sub>158</sub> at different H<sub>2</sub>O/D<sub>2</sub>O ratios. The scattering Intensity at low-q ( $I(q_0)$ ) for samples at different concentration of D<sub>2</sub>O vol% is plotted as the  $\sqrt{I(q_0)}$  vs %D<sub>2</sub>O. A linear fit, indicated by the green line, was used to determine the point where  $\sqrt{I(q_0)} = 0$ .

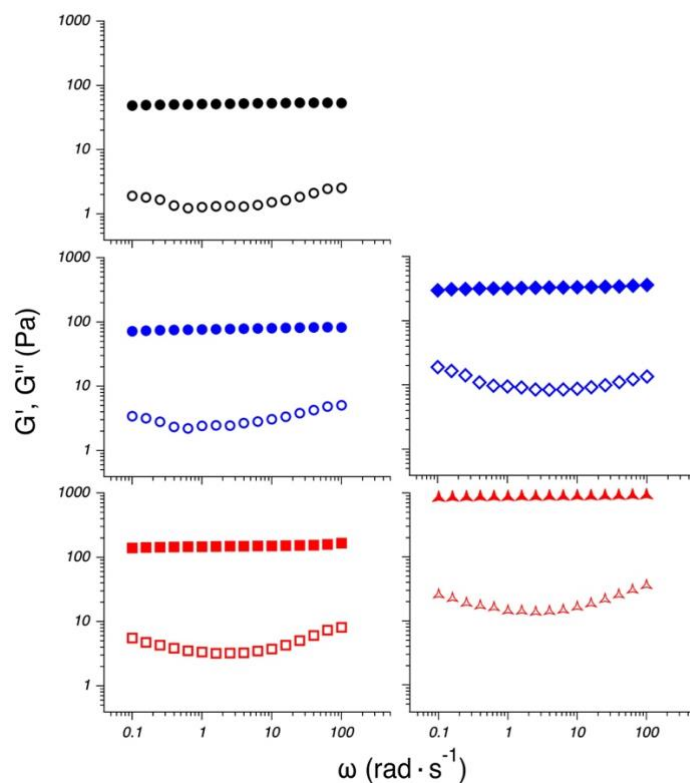

Fig. S2 Frequency sweep performed at constant  $\gamma = 0.1\%$ , after the time sweep described in the main manuscript, for (top) 1 wt% OCNF, (centre-left) 1 wt% OCNF containing 2.5 wt% SiNp<sub>5</sub>, (centre-right) 1 wt% OCNF containing 5 wt% SiNp<sub>5</sub>, (bottom-left) 1 wt% OCNF containing 2.5 wt% SiNp<sub>158</sub>, (bottom-right) 1 wt% OCNF containing 5 wt% SiNp<sub>158</sub>. Filled and empty symbols correspond to  $G'$  and  $G''$ , respectively. All samples contain 100 mM NaCl.

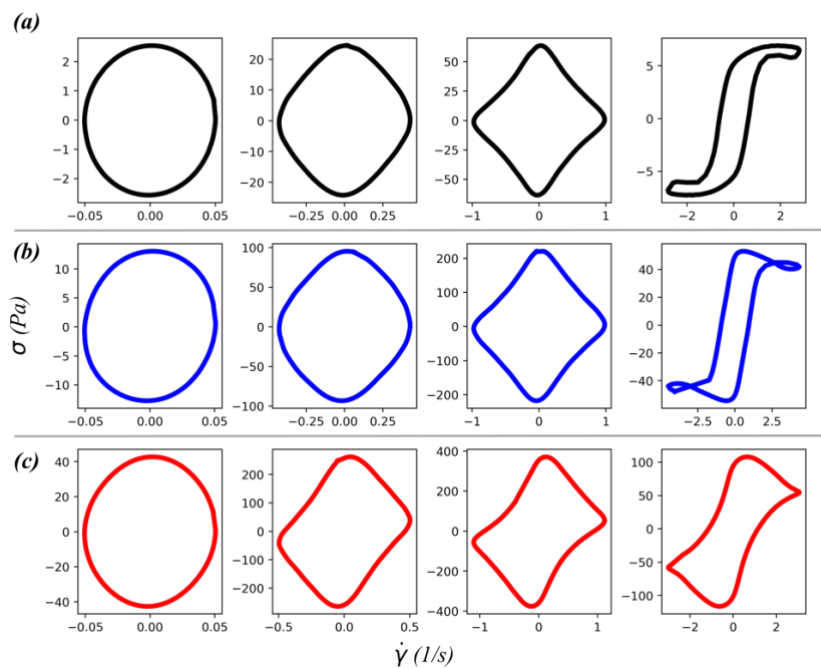

Fig. S3 Viscous projection of Lissajous-plots. (a) 1 wt% OCNF gel, (b) 1 wt% OCNF containing 5 wt% SiNp<sub>5</sub> and (c) 1 wt% OCNF containing 5 wt% SiNp<sub>158</sub> gels.

† Electronic supplementary information (ESI)

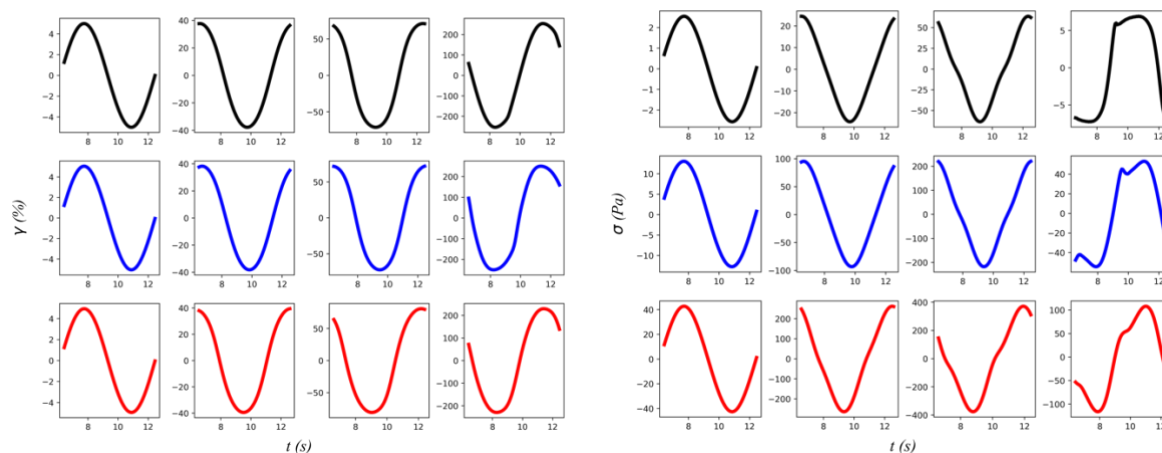

Fig. S4 Sinusoidal deformation shown as  $\gamma$  (%) vs time (s) (left-panel) and the corresponding stress response shown as  $\sigma$  (Pa) vs time (s) (right-panel). The top, central and bottom rows identify the 1wt% OCNF, 1 wt% OCNF containing 5 wt% SiNp<sub>5</sub> and 1 wt% OCNF containing 5 wt% SiNp<sub>158</sub> gels, respectively.

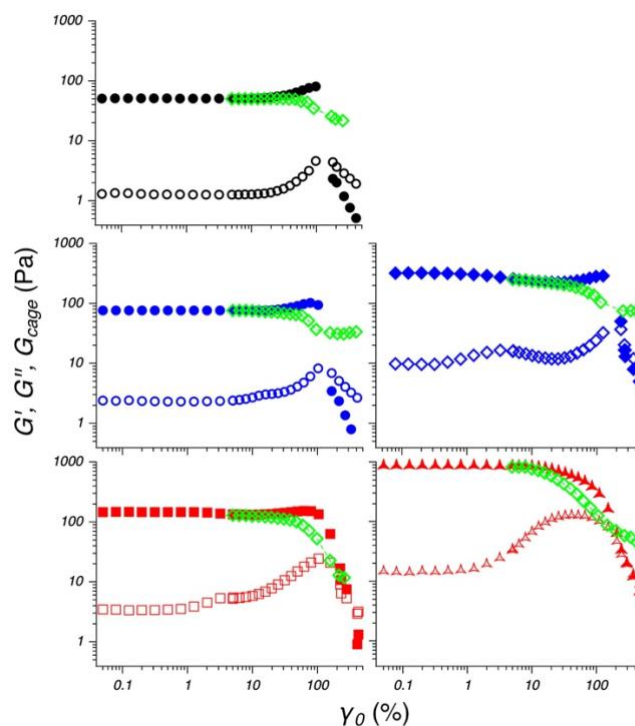

Fig. S5 Strain sweep performed at constant  $\omega = 1$  rad s<sup>-1</sup> for (top) 1 wt% OCNF, (centre-left) 1 wt% OCNF containing 2.5 wt% SiNp<sub>5</sub>, (centre-right) 1 wt% OCNF containing 5 wt% SiNp<sub>5</sub>, (bottom-left) 1 wt% OCNF containing 2.5 wt% SiNp<sub>158</sub>, (bottom-right) 1 wt% OCNF containing 5 wt% SiNp<sub>158</sub>. Filled and empty symbols correspond to  $G'$  and  $G''$ , respectively. The green symbols ( $\diamond$ ) indicates the  $G_{\text{cage}}$ . All samples contain 100 mM NaCl.
